# Supplementary material for: Optimal Revascularization Strategy in Non–ST‐Segment–Elevation Myocardial Infarction With Multivessel Coronary Artery Disease: Culprit‐Only Versus One‐Stage Versus Multistage Revascularization
Source: PubMed Central journal article supplement — J Am Heart Assoc. 2020 Jul 31;9(15):e016575. doi: 10.1161/JAHA.120.016575 (PMC7792267; doi:10.1161/jaha.120.016575), 2020-07-31

# **Supplemental Material**

**Table S1. Baseline Clinical Characteristics Between Culprit-Only PCI and Multi-stage MVR after Propensity-Score Matching.**

|                                    | Culprit-only PCI vs. Multi-stage MVR |                            |                   |                   |            |
|------------------------------------|--------------------------------------|----------------------------|-------------------|-------------------|------------|
|                                    | Culprit-only PCI<br>(N=689)          | Multi-stage MVR<br>(N=311) | Total<br>(N=1000) | <i>P</i><br>Value | SMD<br>(%) |
| <b>Demographics</b>                |                                      |                            |                   |                   |            |
| Age, years                         | 66.3±12.3                            | 65.0±11.6                  | 65.9±12.1         | 0.109             | -8.43      |
| Male                               | 492 (71.4)                           | 237 (76.2)                 | 729 (72.9)        | 0.133             | 9.15       |
| Body mass index                    | 24.0±3.4                             | 23.9±3.3                   | 23.9±3.4          | 0.824             | 0.11       |
| Killip class 3                     | 75 (10.9)                            | 32 (10.3)                  | 107 (10.7)        | 0.864             | -2.39      |
| <b>Process of care index</b>       |                                      |                            |                   |                   |            |
| Symptom-to-door time, h            | 53.0±166.0                           | 49.1±118.8                 | 51.8±152.8        | 0.674             | -2.65      |
| Door-to-balloon time, min          | 24.1±42.8                            | 19.9±33.9                  | 22.8±40.3         | 0.092             | -9.65      |
| <b>Cardiovascular risk factors</b> |                                      |                            |                   |                   |            |
| Hypertension                       | 405 (58.8)                           | 176 (56.6)                 | 581 (58.1)        | 0.562             | -1.84      |
| Diabetes mellitus                  | 250 (36.3)                           | 105 (33.8)                 | 355 (35.5)        | 0.484             | -7.38      |
| Dyslipidemia                       | 72 (10.4)                            | 35 (11.3)                  | 107 (10.7)        | 0.787             | 0.67       |
| Current smoker                     | 238 (34.5)                           | 116 (37.3)                 | 354 (35.4)        | 0.44              | -2.21      |
| Previous history of MI             | 61 (8.9)                             | 23 (7.4)                   | 84 (8.4)          | 0.518             | -3.17      |
| Previous history of PCI            | 62 (9.0)                             | 24 (7.7)                   | 86 (8.6)          | 0.589             | -2.69      |
| Previous history of CVA            | 60 (8.7)                             | 25 (8.0)                   | 85 (8.5)          | 0.819             | -1.20      |
| Familial history                   | 44 (6.4)                             | 16 (5.1)                   | 60 (6.0)          | 0.534             | -2.92      |
| LVEF, %                            | 52.4±11.5                            | 51.3±11.4                  | 52.1±11.5         | 0.177             | -4.21      |
| eGFR                               | 82.0±39.1                            | 85.3±31.2                  | 83.0±36.9         | 0.151             | 9.17       |
| <b>Peak cardiac enzyme levels</b>  |                                      |                            |                   |                   |            |
| Troponin I, ng/ml                  | 25.4±53.2                            | 30.6±54.5                  | 27.0±53.6         | 0.157             | 9.99       |
| CK-MB, ng/ml                       | 59.2±88.7                            | 72.1±94.0                  | 63.2±90.5         | 0.036             | 14.76      |
| <b>Medication at discharge</b>     |                                      |                            |                   |                   |            |
| Aspirin                            | 689 (100)                            | 309 (99.4)                 | 998 (99.8)        | 0.179             | -8.32      |
| P2Y12 inhibitor                    | 686 (99.6)                           | 309 (99.4)                 | 995 (99.5)        | 1.000             | -4.16      |
| ACEI or ARB                        | 576 (83.6)                           | 279 (89.7)                 | 855 (85.5)        | 0.015             | 12.64      |
| Beta-blocker                       | 596 (86.5)                           | 265 (85.2)                 | 861 (86.1)        | 0.654             | -3.85      |
| Statin                             | 657 (95.4)                           | 296 (95.2)                 | 953 (95.3)        | 1.000             | -1.03      |

Values are mean ± SD, median (interquartile range), or n (%). ACEI indicates angiotensin-converting enzyme inhibitor; ARB, angiotensin-II receptor blocker; CK-MB, creatine kinase-myocardial band; CVA, cerebrovascular accident; eGFR, estimated glomerular filtration rate; MI, myocardial infarction; MVR, multivessel revascularization; LVEF, left ventricular ejection fraction; PCI, percutaneous coronary intervention.

**Table S2. Procedural-Related Characteristics Between Culprit-Only PCI and Multi-stage MVR after Propensity-Score Matching.**

|                            | Culprit-only PCI vs. Multi-stage MVR |                               |                    |                   |            |
|----------------------------|--------------------------------------|-------------------------------|--------------------|-------------------|------------|
|                            | Culprit-only<br>PCI<br>(N=689)       | Multi-stage<br>MVR<br>(N=311) | Total<br>(N=1,000) | <i>P</i><br>Value | SMD<br>(%) |
| Culprit lesion profiles    |                                      |                               |                    |                   |            |
| Culprit vessel             |                                      |                               |                    | 0.002             |            |
| Left main artery           | 29 (4.2)                             | 7 (2.3)                       | 36 (3.6)           |                   | 18.48      |
| LAD                        | 258 (37.4)                           | 99 (31.8)                     | 357 (35.7)         |                   | -          |
| LCX                        | 171 (24.8)                           | 63 (20.3)                     | 234 (23.4)         |                   | -1.59      |
| RCA                        | 231 (33.5)                           | 142 (45.7)                    | 373 (37.3)         |                   | 14.81      |
| Type B2/C lesion           | 594 (86.2%)                          | 284 (91.3)                    | 878 (87.8)         | 0.029             | 10.62      |
| Small vessel*              | 248 (36.0)                           | 97 (31.2)                     | 345 (34.5)         | 0.159             | -8.57      |
| Long lesion†               | 309 (44.8)                           | 163 (52.4)                    | 472 (47.2)         | 0.032             | 13.62      |
| Overall-lesion profiles    |                                      |                               |                    |                   |            |
| Left main artery disease   | 68 (9.9)                             | 30 (9.6)                      | 98 (9.8)           | 1                 | 0.00       |
| 3-vessel disease           | 260 (37.7)                           | 170 (54.7)                    | 430 (43.0)         | 0.001             | 13.52      |
| Procedural characteristics |                                      |                               |                    |                   |            |
| Trans-radial approach      | 334 (48.5)                           | 166 (53.4)                    | 500 (50.0)         | 0.336             | 5.58       |
| GP IIb/IIIa inhibitor      | 57 (8.3)                             | 43 (13.8)                     | 100 (10.0)         | 0.009             | 13.51      |
| Thrombus aspiration        | 103 (14.9)                           | 57 (18.3)                     | 160 (16.0)         | 0.209             | 8.38       |
| IRA treatment              |                                      |                               |                    | 0.582             |            |
| Bare metal stent           | 18 (2.6)                             | 5 (1.6)                       | 23 (2.3)           |                   | -          |
| 1st generation DES         | 7 (1.0)                              | 3 (1.0)                       | 10 (1.0)           |                   | 0          |
| 2nd generation DES         | 621 (90.1)                           | 289 (92.9)                    | 910 (91.0)         |                   | 6.84       |
| POBA                       | 43 (6.2)                             | 14 (4.5)                      | 57 (5.7)           |                   | -2.84      |
| Total number of stents     | 1.3±0.6                              | 2.0±0.9                       | 1.5±0.8            | <0.001            | 84.87      |
| Pre-PCI TIMI 0-1 flow      | 295 (42.8)                           | 160 (51.4)                    | 455 (45.5)         | 0.014             | -14.35     |
| IVUS guided PCI            | 181 (26.3)                           | 53 (17.0)                     | 234 (23.4)         | 0.002             | 10.81      |
| OCT guided PCI             | 11 (1.6)                             | 0                             | 11 (1.1)           | 0.056             | 8.91       |
| Hemodynamic support        |                                      |                               |                    |                   |            |
| IABP                       | 3 (0.4)                              | 0                             | 3 (0.3)            | 0.589             | 5.67       |
| ECMO                       | 0                                    | 0                             | 0                  | 1.000             | 0.00       |
| In-hospital complications  |                                      |                               |                    |                   |            |
| Acute heart failure        | 26 (3.8)                             | 20 (6.4)                      | 46 (4.6)           | 0.09              | 9.26       |
| Atrioventricular block     | 5 (0.7)                              | 4 (1.3)                       | 9 (0.9)            | 0.612             | 4.92       |
| Ventricular tachycardia    | 9 (1.3)                              | 5 (1.6)                       | 14 (1.4)           | 0.932             | 1.61       |
| Ventricular fibrillation   | 2 (0.3)                              | 2 (0.6)                       | 4 (0.4)            | 0.782             | 2.77       |

Values are mean ± SD, median [interquartile range], or n (%). ACC/AHA indicates American College of Cardiology/American Heart Association; DES, drug-eluting stent; ECMO, extracorporeal membrane oxygenation; GP, glycoprotein; IABP, intra-aortic balloon pump; IRA, infarct-related artery; IVUS, intravascular ultrasound; LAD, left anterior descending artery; LCX, left circumflex artery; OCT, optical coherence tomography; POBA, plain balloon angioplasty; RCA, right coronary artery; TIMI, Thrombolysis in Myocardial Infarction. \*Small vessel: reference diameter ≤ 2.75 mm. †long lesion: length ≥ 28mm.

**Table S3. Baseline Clinical Characteristics Between One-stage and Multi-stage MVR after Propensity-Score Matching.**

|                                    | One-stage vs. Multi-stage MVR |                               |                   | <i>P</i><br>Value | SMD<br>(%) |
|------------------------------------|-------------------------------|-------------------------------|-------------------|-------------------|------------|
|                                    | One-stage<br>MVR<br>(N=818)   | Multi-stage<br>MVR<br>(N=327) | Total<br>(N=1145) |                   |            |
| <b>Demographics</b>                |                               |                               |                   |                   |            |
| Age, years                         | 65.6±11.5                     | 65.1±11.6                     | 65.4±11.6         | 0.583             | -1.31      |
| Male                               | 579 (70.8)                    | 247 (75.5)                    | 826 (72.1)        | 0.122             | 5.72       |
| Body mass index                    | 24.0±3.6                      | 23.8±3.4                      | 24.0±3.5          | 0.389             | -2.95      |
| Killip class 3                     | 82 (10.0)                     | 37 (11.3)                     | 119 (10.4)        | 0.59              | 2.43       |
| <b>Process of care index</b>       |                               |                               |                   |                   |            |
| Symptom-to-door time, h            | 49.9±118.6                    | 49.1±121.4                    | 49.7±119.4        | 0.921             | -0.51      |
| Door-to-balloon time, min          | 22.8±31.4                     | 19.6±33.3                     | 21.9±31.9         | 0.133             | -6.48      |
| <b>Cardiovascular risk factors</b> |                               |                               |                   |                   |            |
| Hypertension                       | 490 (59.9)                    | 188 (57.5)                    | 678 (59.2)        | 0.495             | -1.95      |
| Diabetes mellitus                  | 276 (33.7)                    | 109 (33.3)                    | 385 (33.6)        | 0.95              | -0.11      |
| Dyslipidemia                       | 104 (12.7)                    | 38 (11.6)                     | 142 (12.4)        | 0.684             | -2.08      |
| Current smoker                     | 552 (67.5)                    | 204 (62.4)                    | 756 (66.0)        | 0.115             | -6.09      |
| Previous history of MI             | 66 (8.1)                      | 23 (7.0)                      | 89 (7.8)          | 0.639             | -4.42      |
| Previous history of PCI            | 41 (5.0)                      | 14 (4.3)                      | 55 (4.8)          | 0.712             | -3.3       |
| Previous history of CVA            | 71 (8.7)                      | 26 (8.0)                      | 97 (8.5)          | 0.778             | -1.71      |
| Familial history                   | 49 (6.0)                      | 17 (5.2)                      | 66 (5.8)          | 0.705             | -0.69      |
| LVEF, %                            | 52.9±10.9                     | 51.1±11.7                     | 52.4±11.2         | 0.016             | -9.05      |
| eGFR                               | 85.2±37.2                     | 85.1±31.9                     | 85.2±35.7         | 0.967             | -1.19      |
| <b>Peak cardiac enzyme levels</b>  |                               |                               |                   |                   |            |
| Troponin I, ng/ml                  | 22.7±80.4                     | 30.2±53.2                     | 24.9±73.7         | 0.066             | 6.83       |
| CK-MB, ng/ml                       | 62.4±207.3                    | 73.0±93.7                     | 65.4±182.3        | 0.235             | 6.77       |
| <b>Medication at discharge</b>     |                               |                               |                   |                   |            |
| Aspirin                            | 818 (100)                     | 327 (100)                     | 1145 (100)        | 1.000             | 0          |
| P2Y12 inhibitor                    | 818 (100)                     | 327 (100)                     | 1145 (100)        | 1.000             | 0          |
| ACEI or ARB                        | 686 (83.9)                    | 289 (88.4)                    | 975 (85.2)        | 0.064             | 9.46       |
| Beta-blocker                       | 713 (87.2)                    | 280 (85.6)                    | 993 (86.7)        | 0.551             | -4.54      |
| Statin                             | 783 (95.7)                    | 312 (95.4)                    | 1095 (95.6)       | 0.944             | -1.97      |

Values are mean ± SD, median (interquartile range), or n (%). ACEI indicates angiotensin-converting enzyme inhibitor; ARB, angiotensin-II receptor blocker; CK-MB, creatine kinase-myocardial band; CVA, cerebrovascular accident; eGFR, estimated glomerular filtration rate; MI, myocardial infarction; MVR, multivessel revascularization; LVEF, left ventricular ejection fraction; PCI, percutaneous coronary intervention.

**Table S4. Procedural-Related Characteristics Between One-stage and Multi-stage MVR after Propensity-Score Matching.**

|                                   | One-stage vs. Multi-stage MVR |                         |                |         |         |
|-----------------------------------|-------------------------------|-------------------------|----------------|---------|---------|
|                                   | One-stage MVR (N=818)         | Multi-stage MVR (N=327) | Total (N=1145) | P Value | SMD (%) |
| <b>Culprit lesion profiles</b>    |                               |                         |                |         |         |
| Culprit vessel                    | 26 (3.2)                      | 7 (2.1)                 | 33 (2.9)       | 0.004   |         |
| Left main artery                  | 300 (36.7)                    | 104 (31.8)              | 404 (35.3)     |         | -3.91   |
| LAD                               | 212 (25.9)                    | 67 (20.5)               | 279 (24.4)     |         | -       |
| LCX                               | 280 (34.2)                    | 149 (45.6)              | 429 (37.5)     |         | -7.58   |
| RCA                               | 26 (3.2)                      | 7 (2.1)                 | 33 (2.9)       |         | 12.86   |
| Type B2/C lesion                  | 718 (87.8)                    | 299 (91.4)              | 1017 (88.8)    | 0.094   | 8.26    |
| Small vessel*                     | 290 (35.5)                    | 103 (31.5)              | 393 (34.3)     | 0.229   | -4.63   |
| Long lesion†                      | 393 (48.0)                    | 172 (52.6)              | 565 (49.3)     | 0.184   | 5.4     |
| <b>Overall-lesion profiles</b>    |                               |                         |                |         |         |
| Left main artery disease          | 72 (8.8)                      | 29 (8.9)                | 101 (8.8)      | 1       | 1.07    |
| 3-vessel disease                  | 359 (43.9)                    | 179 (54.7)              | 538 (47.0)     | 0.001   | 13.41   |
| <b>Procedural characteristics</b> |                               |                         |                |         |         |
| Trans-radial approach             | 411 (50.2)                    | 176 (53.8)              | 587 (51.3)     | 0.545   | 4.19    |
| GP IIb/IIIa inhibitor             | 70 (8.6)                      | 44 (13.5)               | 114 (10.0)     | 0.017   | 7.68    |
| Thrombus aspiration               | 76 (9.3)                      | 60 (18.3)               | 136 (11.9)     | 0       | 11.83   |
| IRA treatment                     |                               |                         |                | 0.992   |         |
| Bare metal stent                  | 11 (1.3)                      | 5 (1.5)                 | 16 (1.4)       |         | -       |
| 1st generation DES                | 5 (0.6)                       | 2 (0.6)                 | 7 (0.6)        |         | 0.47    |
| 2nd generation DES                | 762 (93.2)                    | 305 (93.3)              | 1067 (93.2)    |         | 0.99    |
| POBA                              | 40 (4.9)                      | 15 (4.6%)               | 55 (4.8)       |         | -1.72   |
| Total number of stents            | 2.4±1.0                       | 2.6±1.1                 | 2.5±1.0        | 0.015   | 10.48   |
| Pre-PCI TIMI 0-1 flow             | 342 (41.8)                    | 168 (51.4)              | 510 (44.5)     | 0.004   | -12.73  |
| IVUS guided PCI                   | 179 (21.9)                    | 59 (18.0)               | 238 (20.8)     | 0.172   | -7.61   |
| OCT guided PCI                    | 4 (0.5)                       | 0                       | 4 (0.3)        | 0.476   | 6.38    |
| <b>Hemodynamic support</b>        |                               |                         |                |         |         |
| IABP                              | 2 (0.2)                       | 0                       | 2 (0.2)        | 0.911   | 4.51    |
| ECMO                              | 0                             | 0                       | 0              | 1.000   | 0.00    |
| <b>In-hospital complications</b>  |                               |                         |                |         |         |
| Acute heart failure               | 32 (3.9)                      | 21 (6.4)                | 53 (4.6)       | 0.095   | 6.5     |
| Atrioventricular block            | 3 (0.4)                       | 4 (1.2)                 | 7 (0.6)        | 0.208   | 6.08    |
| Ventricular tachycardia           | 5 (0.6)                       | 5 (1.5)                 | 10 (0.9)       | 0.248   | 5.36    |
| Ventricular fibrillation          | 3 (0.4)                       | 2 (0.6)                 | 5 (0.4)        | 0.943   | 3.3     |

Values are mean ± SD, median [interquartile range], or n (%). ACC/AHA indicates American College of Cardiology/American Heart Association; DES, drug-eluting stent; ECMO, extracorporeal membrane oxygenation; GP, glycoprotein; IABP, intra-aortic balloon pump; IRA, infarct-related artery; IVUS, intravascular ultrasound; LAD, left anterior descending artery; LCX, left circumflex artery; OCT, optical coherence tomography; POBA, plain balloon angioplasty; RCA, right coronary artery; TIMI, Thrombolysis in Myocardial Infarction. \*Small vessel: reference diameter ≤ 2.75 mm. †long lesion: length ≥ 28mm.

**Table S5. Baseline Clinical Characteristics Between Culprit-only PCI and One-stage MVR after Propensity-Score Matching.**

|                                    | Culprit-only PCI vs. One-stage MVR |                          |                   |                   |            |
|------------------------------------|------------------------------------|--------------------------|-------------------|-------------------|------------|
|                                    | Culprit-only PCI<br>(N=969)        | One-stage MVR<br>(N=969) | Total<br>(N=1938) | <i>P</i><br>Value | SMD<br>(%) |
| <b>Demographics</b>                |                                    |                          |                   |                   |            |
| Age, years                         | 66.1±12.0                          | 66.3±11.5                | 66.2±11.8         | 0.715             | 1.7        |
| Male                               | 681 (70.3)                         | 671 (69.2)               | 1352 (69.8)       | 0.656             | -2.21      |
| Body mass index                    | 24.0±3.3                           | 24.1±3.5                 | 24.1±3.4          | 0.420             | 3.55       |
| Killip class 3                     | 98 (10.1)                          | 91 (9.4)                 | 189 (9.8)         | 0.646             | -2.45      |
| <b>Process of care index</b>       |                                    |                          |                   |                   |            |
| Symptom-to-door time, h            | 41.2±111.7                         | 45.3±115.0               | 43.3±113.3        | 0.421             | 3.61       |
| Door-to-balloon time, min          | 29.1±60.4                          | 27.5±47.3                | 28.3±54.2         | 0.515             | -3.37      |
| <b>Cardiovascular risk factors</b> |                                    |                          |                   |                   |            |
| Hypertension                       | 575 (59.3)                         | 574 (59.2)               | 1149 (59.3)       | 1.000             | -0.21      |
| Diabetes mellitus                  | 352 (36.3)                         | 342 (35.3)               | 694 (35.8)        | 0.670             | -2.16      |
| Dyslipidemia                       | 117 (12.1)                         | 117 (12.1)               | 234 (12.1)        | 1.000             | 0          |
| Current smoker                     | 658 (67.9)                         | 690 (71.2)               | 1348 (69.6)       | 0.126             | 7.24       |
| Previous history of MI             | 97 (10.0)                          | 75 (7.7)                 | 172 (8.9)         | 0.093             | -8.67      |
| Previous history of PCI            | 87 (9.0)                           | 61 (6.3)                 | 148 (7.6)         | 0.032             | -9.13      |
| Previous history of CVA            | 82 (8.5)                           | 82 (8.5)                 | 164 (8.5)         | 1.000             | 0          |
| Familial history                   | 62 (6.4)                           | 63 (6.5)                 | 125 (6.4)         | 1.000             | 0.41       |
| LVEF, %                            | 52.8±11.2                          | 53.7±10.7                | 53.3±11.0         | 0.076             | 8.06       |
| eGFR                               | 83.9±39.1                          | 84.8±37.1                | 84.3±38.1         | 0.594             | 2.37       |
| <b>Peak cardiac enzyme levels</b>  |                                    |                          |                   |                   |            |
| Troponin I, ng/ml                  | 23.0±49.9                          | 18.3±34.4                | 20.6±42.9         | 0.016             | -6.81      |
| CK-MB, ng/ml                       | 58.2±120.3                         | 52.9±86.6                | 55.5±104.8        | 0.264             | -3.06      |
| <b>Medication at discharge</b>     |                                    |                          |                   |                   |            |
| Aspirin                            | 969 (100)                          | 969 (100)                | 1938 (100)        | 1.000             | 0          |
| P2Y12 inhibitor                    | 964 (99.5)                         | 966 (99.7)               | 1930 (99.6)       | 0.723             | 4.21       |
| ACEI or ARB                        | 787 (81.2)                         | 786 (81.1)               | 1573 (81.2)       | 1.000             | -0.26      |
| Beta-blocker                       | 832 (85.9)                         | 832 (85.9)               | 1664 (85.9)       | 1.000             | 0          |
| Statin                             | 908 (93.7)                         | 928 (95.8)               | 1836 (94.7)       | 0.053             | 9.41       |

Values are mean ± SD, median (interquartile range), or n (%). ACEI indicates angiotensin-converting enzyme inhibitor; ARB, angiotensin-II receptor blocker; CK-MB, creatine kinase-myocardial band; CVA, cerebrovascular accident; eGFR, estimated glomerular filtration rate; MI, myocardial infarction; MVR, multivessel revascularization; LVEF, left ventricular ejection fraction; PCI, percutaneous coronary intervention.

**Table S6. Procedural-Related Characteristics Between Culprit-only PCI and One-stage MVR after Propensity-Score Matching.**

|                                   | Culprit-only PCI vs. One-stage MVR |                          |                   |         |         |
|-----------------------------------|------------------------------------|--------------------------|-------------------|---------|---------|
|                                   | Culprit-only PCI<br>(N=969)        | One-stage MVR<br>(N=969) | Total<br>(N=1938) | P Value | SMD (%) |
| <b>Culprit lesion profiles</b>    |                                    |                          |                   |         |         |
| Culprit vessel                    |                                    |                          |                   | 0.347   |         |
| Left main artery                  | 55 (5.7)                           | 72 (7.4)                 | 127 (6.6)         |         | 7.03    |
| LAD                               | 347 (35.8)                         | 359 (37.0)               | 706 (36.4)        |         | -       |
| LCX                               | 277 (28.6)                         | 267 (27.6)               | 544 (28.1)        |         | 9.41    |
| RCA                               | 290 (29.9)                         | 271 (28.0)               | 561 (28.9)        |         | -4.37   |
| Type B2/C lesion                  | 808 (83.4)                         | 828 (85.4)               | 1636 (84.4)       | 0.234   | 5.74    |
| Small vessel*                     | 363 (37.5)                         | 364 (37.6)               | 727 (37.5)        | 1.000   | 0.21    |
| Long lesion†                      | 440 (45.4)                         | 433 (44.7)               | 873 (45.0)        | 0.784   | -1.45   |
| <b>Overall-lesion profiles</b>    |                                    |                          |                   |         |         |
| Left main artery disease          | 97 (10.0)                          | 128 (13.2)               | 225 (11.6)        | 0.33    | 9.66    |
| 3-vessel disease                  | 303 (31.3)                         | 347 (35.8)               | 650 (33.5)        | 0.39    | 9.42    |
| <b>Procedural characteristics</b> |                                    |                          |                   |         |         |
| Trans-radial approach             | 472 (48.7)                         | 468 (48.3)               | 940 (48.5)        | 0.983   | -0.83   |
| GP IIb/IIIa inhibitor             | 49 (5.1)                           | 64 (6.6)                 | 113 (5.8)         | 0.175   | 6.17    |
| Thrombus aspiration               | 101 (10.4)                         | 65 (6.7)                 | 166 (8.6)         | 0.004   | -15.14  |
| IRA treatment                     |                                    |                          |                   | 0.002   |         |
| Bare metal stent                  | 27 (2.8)                           | 19 (2.0)                 | 46 (2.4)          |         | -       |
| 1st generation DES                | 10 (1.0)                           | 7 (0.7)                  | 17 (0.9)          |         | -3.87   |
| 2nd generation DES                | 838 (86.5)                         | 890 (91.8)               | 1728 (89.2)       |         | 19.38   |
| POBA                              | 94 (9.7)                           | 53 (5.5)                 | 147 (7.6)         |         | -18.0   |
| Total number of stents            | 1.2±0.7                            | 2.3±1.0                  | 1.8±1.0           | <0.001  | 10.65   |
| Pre-PCI TIMI 0-1 flow             | 368 (38.0)                         | 356 (36.7)               | 724 (37.4)        | 0.605   | 2.59    |
| IVUS guided PCI                   | 235 (24.3)                         | 262 (27.0)               | 497 (25.6)        | 0.176   | 6.33    |
| OCT guided PCI                    | 29 (3.0)                           | 26 (2.7)                 | 55 (2.8)          | 0.784   | -1.8    |
| <b>Hemodynamic support</b>        |                                    |                          |                   |         |         |
| IABP                              | 4 (0.4)                            | 9 (0.9)                  | 13 (0.7)          | 0.266   | 5.78    |
| ECMO                              | 1 (0.1)                            | 0                        | 1 (0.1)           | 1.000   | 0       |
| <b>In-hospital complications</b>  |                                    |                          |                   |         |         |
| Acute heart failure               | 41 (4.2)                           | 36 (3.7)                 | 77 (4.0)          | 0.642   | -2.68   |
| Atrioventricular block            | 7 (0.7)                            | 6 (0.6)                  | 13 (0.7)          | 1.000   | -1.49   |
| Ventricular tachycardia           | 9 (0.9)                            | 6 (0.6)                  | 15 (0.8)          | 0.604   | -4.47   |
| Ventricular fibrillation          | 3 (0.3)                            | 1 (0.1)                  | 4 (0.2)           | 0.617   | -4.21   |

Values are mean ± SD, median [interquartile range], or n (%). ACC/AHA indicates American College of Cardiology/American Heart Association; DES, drug-eluting stent; ECMO, extracorporeal membrane oxygenation; GP, glycoprotein; IABP, intra-aortic balloon pump; IRA, infarct-related artery; IVUS, intravascular ultrasound; LAD, left anterior descending artery; LCX, left circumflex artery; OCT, optical coherence tomography; POBA, plain balloon angioplasty; RCA, right coronary artery; TIMI, Thrombolysis in Myocardial Infarction. \*Small vessel: reference diameter ≤ 2.75 mm. †long lesion: length ≥ 28mm.

**Figure S1. Covariate Balance Between Culprit-Only PCI and Multi-stage MVR – IPW.**

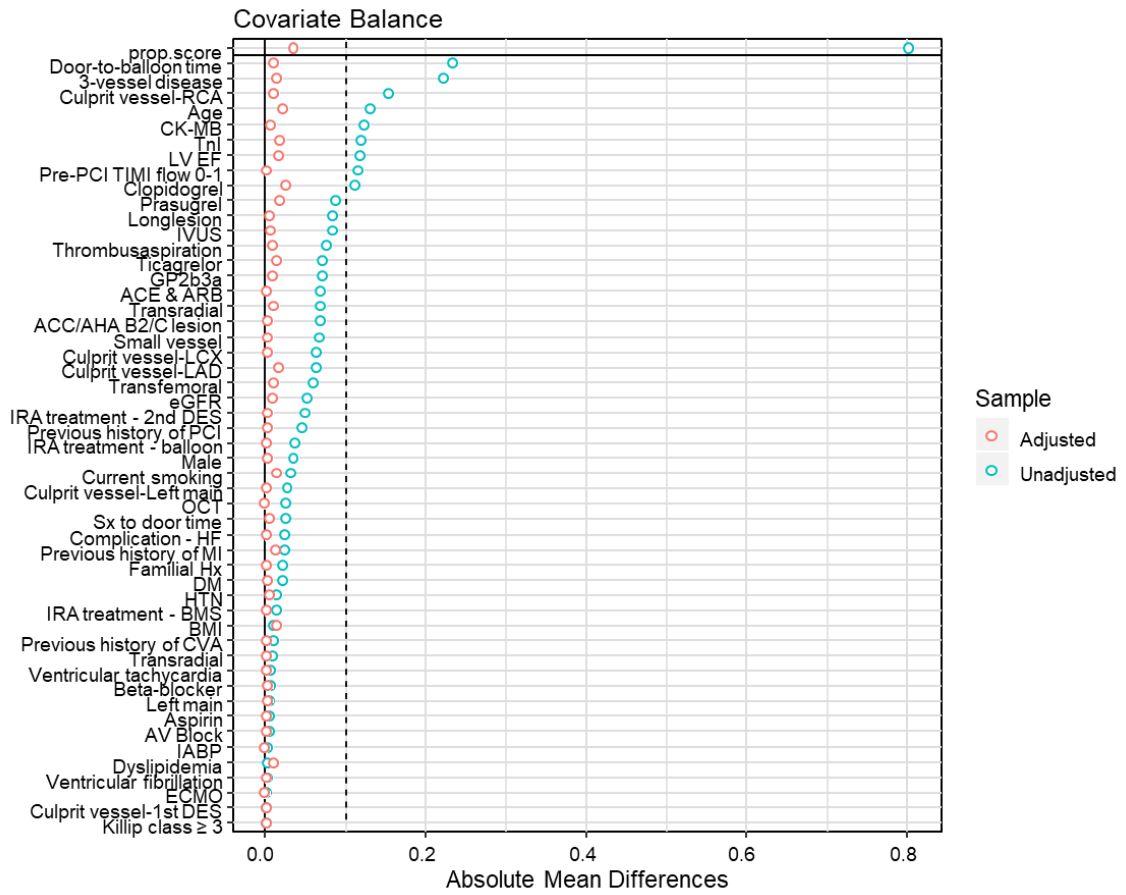



Figure S2. Covariate Balance Between One-stage and Multi-stage MVR – IPW.

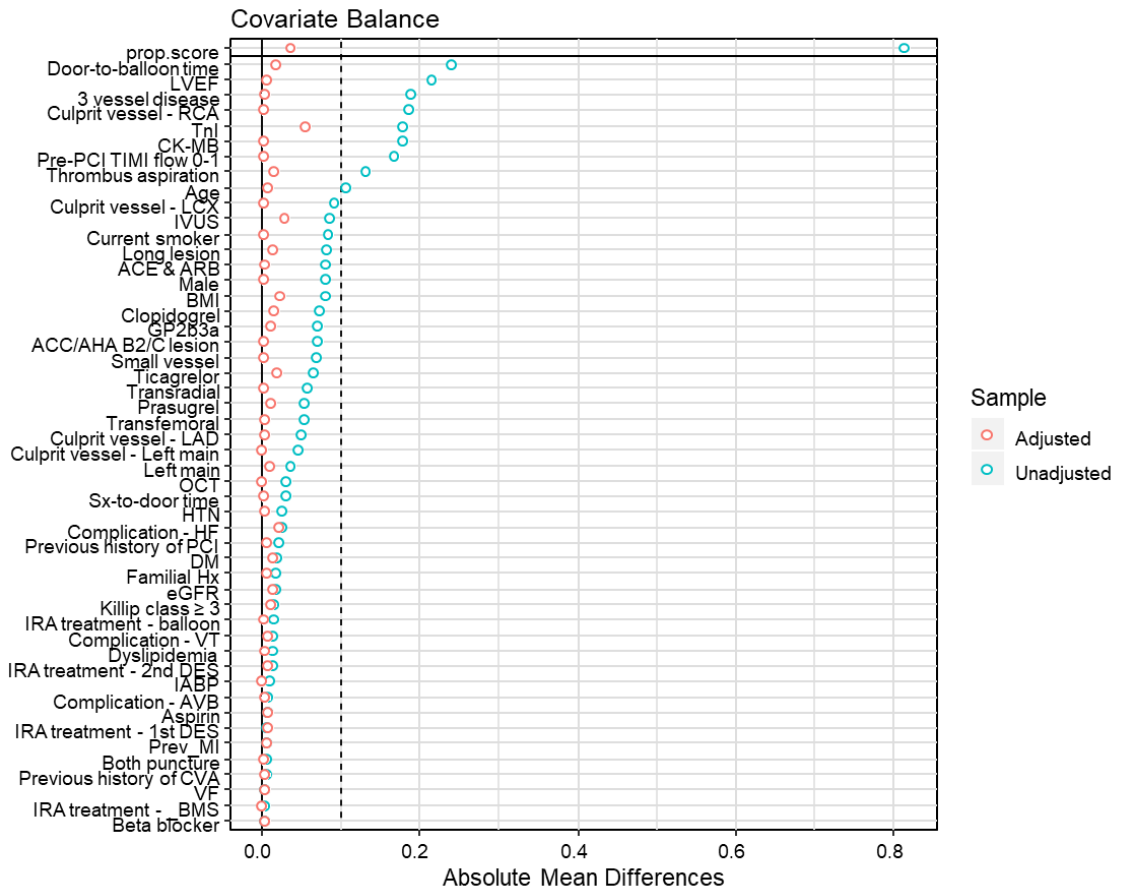

**Figure S3. Covariate Balance Between Culprit only PCI and One-stage MVR – IPW.**

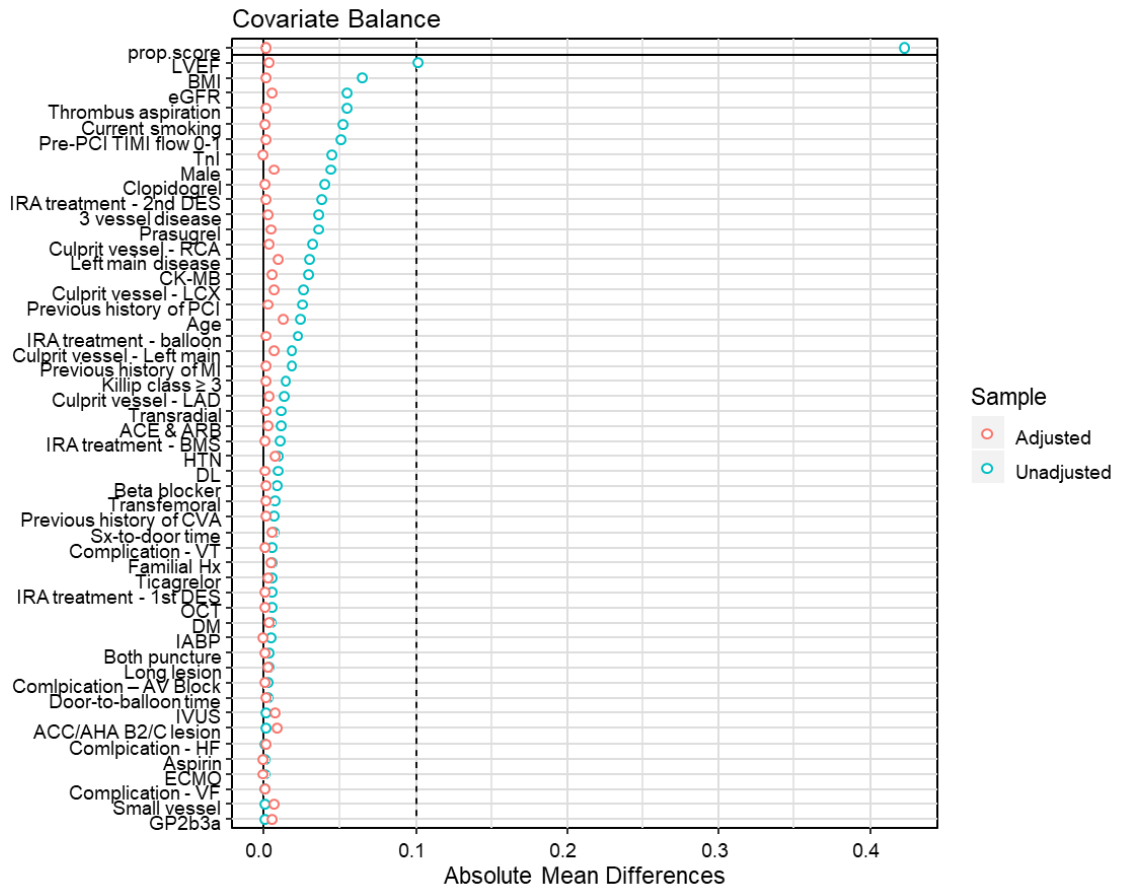

Supplement: JAH3-9-e016575-s001.pdf [file JAH3-9-e016575-s001.pdf]
